Review

# Tumour necrosis factor alpha and the cardiovascular system: its role in cardiac allograft rejection and heart disease

May Azzawi\*, Philip Hasleton

Department of Pathology, Regional Cardiothoracic Centre, Wythenshawe Hospital, Southmoore Road, Manchester M23 9LT, UK

Received 6 November 1998; accepted 29 March 1999

**Keywords:** Human; Rejection; Heart failure; Myocardium; Atherosclerosis

## 1. Introduction

Tumour necrosis factor alpha (TNF $\alpha$ ) is a pleiotropic cytokine that has many proinflammatory actions with negative inotropic effects. It has been implicated in the pathogenesis of many non-infectious disorders, from rheumatoid disease [1], to multiple sclerosis [2]. This cytokine also affects the heart [3] where it is produced by immune cells and the myocardium in some diseases. Raised serum TNF $\alpha$  is seen in patients with cardiomyopathy, myocardial infarction, and chronic heart failure [4], thus implicating TNF $\alpha$  in disease pathogenesis. Raised serum levels of this cytokine have also been identified in transplant patients following episodes of acute cellular rejection. There is a correlation between TNF $\alpha$  expression and rejection grade [5] suggesting that the cytokine is a candidate marker of rejection.

In this review, we consider the basic biology of TNF $\alpha$  in relation to certain cardiac diseases. There are interrelationships between some of the conditions described, but these have been arbitrarily divided into three main groups: allograft rejection, coronary artery disease, and heart failure.

## 2. Basic biology and function of TNF $\alpha$ : a summary

Tumour necrosis factor alpha, cachectin (TNF $\alpha$ ), was originally identified for its potent toxicity against tumour cells, hence its name [6]. Today, TNF $\alpha$  is recognised as a pleiotropic cytokine functioning within a complex and tightly regulated cytokine network. It activates multiple transduction pathways, inducing or suppressing a wide variety of genes, including those encoding the production

of cytokines, adhesion molecules, and inducible nitric oxide synthase (iNOS). TNF $\alpha$  has many proinflammatory actions: orchestrating the inflammatory response through activation of proinflammatory cytokine genes, such as IL-1 and IL-6, as well as its own production [7]. This section will summarise our current understanding of the biology and function of TNF $\alpha$  with particular emphasis on the heart, and review recent work on the regulation of its production.

### 2.1. TNF $\alpha$ molecule

The TNF $\alpha$  molecule (a 157 amino acid polypeptide;  $M_r$  17 356) exists as both a membrane bound and a secreted molecule, both bioactive [8]. TNF $\alpha$  acts at the cellular level via both type I (p55) and type II (p75) receptors. Both receptors have been localized in the human myocardium [9]. Activation by TNF $\alpha$  of different transduction mechanisms may operate through separate TNF $\alpha$  receptors. Both receptors can be up or downregulated under different pathophysiological conditions [9].

The activated macrophage is the main source of TNF $\alpha$ , containing both cell associated and membrane bound TNF $\alpha$  [10]. Analysis of the kinetics of TNF $\alpha$  secretion, demonstrated that bioactivity appeared after 2 h of macrophage culture stimulation, reaching a maximum by 4–8 h and disappearing by 12 h. The cytokine is rapidly synthesised and released on demand, and not stored in the cytoplasm. Other cells releasing TNF $\alpha$  include lymphocytes, fibroblasts, neutrophils, smooth muscle and mast cells. The ability of adult mammalian myocardial cells to release TNF $\alpha$  after endotoxin stimulation has been shown [11].

\*Corresponding author. Tel.: +44-161-282-1261; fax: +44-161-718-7167.

Time for primary review 32 days.

## 2.2. Molecular regulation of TNF $\alpha$ production

The TNF $\alpha$  gene is one of the earliest genes to be transcribed after T lymphocyte activation. Transcription of mRNA does not require de novo protein synthesis, as do other cytokines, such as IL-2 [12]. There is a high baseline transcription of TNF $\alpha$  mRNA by comparison to other cytokines such as TNF $\beta$  [13].

Both positive and negative regulatory gene elements affect TNF $\alpha$  gene transcription [14], as well as other cytokines, such as GM-CSF and IL-4. These can differentially regulate transcription, through acting on upstream promoter elements [15].

Production of the TNF $\alpha$  gene product is regulated at the post-transcriptional level. The TNF $\alpha$  mRNA has a very short half-life (30 min) by comparison to the mRNA half-life of TNF $\beta$  (5.5 h) [13]. A conserved consensus sequence (UUAUUUAU) in the 3' untranslated region of the mRNA destabilizes the mRNA and shortens its half-life [16,17]. Various degradative pathways can degrade mRNA [18], for example, via poly A tail removal [19]. These regulatory mechanisms limit the use of in situ hybridisation techniques in detecting mRNA transcripts. Messenger RNA's sensitivity to tissue fixation, can further result in false negative results. TNF $\alpha$  production is also subjected to translational control. Translational derepression, occurs following lipopolysaccharide (LPS) induction and the translational rates of TNF $\alpha$  mRNA are accelerated [18,20]. TNF $\alpha$  mRNA expression is not constitutive in adult myocardium, but induced [10,21]. However, constitutive expression has been documented in other normal tissues, such as the spleen, liver, and kidney [21,22].

## 2.3. Genetic variation in TNF $\alpha$ levels

Within the normal population, there is considerable variation in the amount of TNF $\alpha$  produced. Such variation is also seen when peripheral blood lymphocytes [23] and mononuclear cell populations [24] are stimulated with endotoxin [25,26]. Polymorphisms within microsatellite regions flanking the TNF locus have been identified [27,28]. Five microsatellite regions are described: TNF a, b, c, d and TNF-e. High levels of in vitro TNF $\alpha$  production from mononuclear cell populations are associated with the TNFa2 allele and low levels with TNFa6 allele, respectively. In addition, there are polymorphisms within the TNF $\alpha$  promoter region as follows: a point mutation of G to A in position -308 (termed TNF1 and TNF2, respectively) and in position -238 predisposes to higher TNF production. Studies using reporter gene assays have demonstrated an increase in the level of TNF gene transcription when the TNF2 allele is inserted [29–30]. Two additional G/A mutations at position -376 and -163 are described [31]. An insertional 'C' polymorphism is also described at position +70 [32] resulting in an 8'C rather than 7'C repeated sequence.

## 2.4. Effects of TNF $\alpha$ on cardiac function

Administration of large amounts of TNF $\alpha$  to the circulation causes shock due to a decrease in peripheral vascular resistance and direct cardiac effects [33]. Mann has argued that the net effect of TNF $\alpha$  on cardiac function will depend on the amount and duration of TNF $\alpha$  expression. Short term expression of TNF $\alpha$  within the heart may be an adaptive response to 'stress', whereas long term expression may be maladaptive by producing cardiac decompensation [34]. Excessive TNF $\alpha$  levels can produce left ventricular dysfunction [35], cardiomyopathy, and the clinical manifestation of heart failure [36,37]. TNF $\alpha$  can affect heart failure, in part, by stimulating myocyte hypertrophy, through the generation of reactive oxygen intermediates in cardiac myocytes [38], and also by inducing ventricular remodeling, through stimulating extracellular matrix protein production and increased turnover of matrix [35,39]. TNF $\alpha$  will cause cardiomyocyte loss, through necrosis, or apoptosis, as demonstrated in in vitro models. It can induce apoptosis directly, via the TNF receptor, or indirectly, through stimulation of nitric oxide (NO) production [40]. Evidence now suggests that cardiotropin-1, produced by cardiomyocytes, is able to inhibit cytokine-induced cardiomyocyte apoptosis in vitro [40]. The effects of TNF $\alpha$  on myocardial contractility and left ventricular dysfunction, were first demonstrated in animal models [41,42].

TNF $\alpha$  can depress myocardial function through two major pathways. The NO-dependent pathway [35,36,43], and the sphingomyelinase (sphingosine-dependent) pathway [44]. Activation of the NO-dependent pathway can induce negative inotropic effects on isolated cardiac myocytes, causing immediate cell contraction, through stimulation of iNOS production [45]. The resultant increase in NO will act as an important intracellular signalling molecule, that mediates the negative inotropic effects. Even though TNF has negative inotropic effects on isolated myocytes, its net effect on the whole heart is an increase in end diastolic pressure, resulting in increased ventricular volume. The induction of iNOS and its effects on cardiac function in allograft rejection, have been reviewed in detail [46].

Activation of the sphingomyelinase pathway will result in breakdown of the phospholipid, sphingomyelin, to its metabolites ceramide and sphingosine [47]. Both can act as second messengers in the signalling pathways. Edmunds and Woodward showed that the early increase in coronary perfusion pressure following TNF $\alpha$  treatment of rat perfused hearts, was due to early coronary vasoconstriction, mediated by sphingosine and thromboxane A2 [44].

TNF $\alpha$ , at low non-toxic concentrations, depresses cultured myocyte contractile performance independently of NO, through blocking  $\alpha$ - and  $\beta$ -adrenoceptor-stimulated increase in contractility [35,48]. Several other studies have analysed the effects of TNF $\alpha$  on myocardial calcium handling as one mechanism of TNF $\alpha$ -induced contractile

Table 1  
Summary of the effects of TNF $\alpha$  on the cardiovascular system

| Process |                                                                                                             | Effect | Manifestation of condition                      |                                  |
|---------|-------------------------------------------------------------------------------------------------------------|--------|-------------------------------------------------|----------------------------------|
| ↑       | Adhesion molecule expression<br>MHC molecule expression<br>Vascular permeability                            | ⇒      | Increased immunogenicity,<br>rejection response | Allograft rejection              |
|         | Activation of inflammatory cells<br>And cytokine release                                                    | ⇒      | Orchestration of<br>the inflammatory response   | Allograft rejection,<br>CAD, CHF |
| ↑       | Turnover of matrix,<br>Extracellular matrix proteins                                                        | ⇒      | Ventricular remodeling                          | CHF                              |
| ↑       | Reactive oxygen intermediates                                                                               | ⇒      | Myocyte hypertrophy                             | CHF                              |
|         | Disruption of calcium handling<br>Uncoupling of $\beta$ -adrenergic receptors<br>Reduced inotropic response | ⇒      | Contractile dysfunction                         | CHF, Allograft rejection         |
| ↓       | Left ventricular ejection fraction                                                                          |        | Ventricular dysfunction                         |                                  |
|         | Apoptosis                                                                                                   | ⇒      | Cardiomyocyte loss                              | Allograft rejection, CHF         |
| ↑       | Reduce lipoprotein lipase activity<br>Triglyceride levels,<br>hepatic fatty acid synthesis                  | ⇒      | Contribute to atheroma formation                | CAD                              |
|         | Procoagulant activity                                                                                       |        |                                                 |                                  |

CAD: coronary artery disease; CHF: congestive heart failure.

dysfunction [49]. TNF $\alpha$ -induced disruption of calcium handling may lead to dysfunctional excitation–contraction coupling causing systolic and/or diastolic dysfunction [37]. The observations of Schreiner suggest that the effects of TNF $\alpha$  on cardiac contractile cell function, are reversible, both in animal models, and in clinical manifestations of heart failure, including allograft rejection [35]. The actions of TNF $\alpha$  on left ventricular dysfunction were shown to be partially reversible in animal models following treatment with TNF $\alpha$  antagonists [50]. The effects of TNF $\alpha$  are listed in Table 1.

### 3. Role of TNF $\alpha$ in allograft rejection

#### 3.1. Allograft rejection: the need for a predictor

Acute cardiac allograft rejection is an immune-mediated response, hallmarked by cellular infiltration and myocyte damage in the transplanted heart. The infiltrate consists largely of T lymphocytes and macrophages. In more severe forms, polymorphonuclear cells and eosinophils are also recruited [51]. Both the CD4+ T lymphocytes and macrophages play a major role in directing the rejection response, through elaboration of initiator cytokines, such as TNF $\alpha$ , and the induction of effector molecules such as NO [52]. Moderate to severe rejection episodes may initially be asymptomatic in some cases, but are often followed by breathlessness, pyrexia, and raised intracardiac pressures (end-diastolic). Lesser grades of rejection have no clinical signs or symptoms. In the early 1970s, endomyocardial biopsy (EMB) was introduced, and is now the ‘gold’

standard for monitoring cardiac transplants. Rejection is graded histologically from mild to severe, depending on the extent and type of cellular infiltrate and degree of myocyte damage, according to the Working Formulation of the International Heart and Lung Transplant Study Group (ISHLT) [51]. The immunosuppressive regimen following transplantation is altered according to the grade of rejection and clinical symptoms. However, due to limitations of the biopsy procedure (such as sampling error), the risk of over-immunosuppression or under-immunosuppression remains a problem, particularly for the management of mild to focal moderate rejection (ISHLT grades 1 and 2, respectively) [53–55]. Hence there is a pressing need to identify a marker that can predict rejection. An alternative non-invasive method of diagnosis, such as serum analysis, would be of great benefit.

#### 3.2. Involvement of TNF $\alpha$ in rejection

TNF $\alpha$  has many proinflammatory functions and hence has been implicated in the initiation and orchestration of the rejection response. The rejection response is initiated by activation of CD4+ T helper cells by alloantigen, either through direct stimulation by donor antigen presenting cells, or indirectly by recipient antigen presenting cells. Activated T helper cells will release initiator cytokines such as IL-1 $\beta$ , IL-2, and interferon  $\gamma$ , which in turn activate macrophages to release TNF $\alpha$  [56]. TNF $\alpha$  participates in initiating the response through upregulation of MHC molecule expression required for specific T cell activation and increased cellular infiltration through endothelial cell activation and adhesion molecule expression

[57]. TNF $\alpha$  will further maintain the inflammatory response within the rejection infiltrate through upregulation of adhesion molecules, increased vascular permeability, and activation of inflammatory cells [57] (Table 1).

Early suggestions that TNF $\alpha$  may play a role in the rejection response, came from two sources. Firstly, observations were made that cardiac [58], renal [59,60], and liver [61], transplant recipients, had raised serum levels of TNF $\alpha$  following rejection episodes, although no causal relationship was established. The second source of evidence came from animal models of acute cardiac allograft rejection. Anti-TNF antibody therapy prolonged cardiac allograft survival in the rat [62,63], although this was not demonstrated for allogenic skin in Rhesus monkeys [64]. In addition, localization of the protein and mRNA transcripts within the rejection infiltrate of both cardiac [5,65], and renal [66,67] allografts, provided supporting evidence for the role of TNF $\alpha$  in rejection. In cardiac allografts, the presence of protein TNF $\alpha$  correlated with higher grades of rejection [5]. When EMB were examined for both TNF mRNA transcript and protein product expression, using combined in situ hybridisation and immunohistochemistry [65], approximately half of the cases positive for TNF mRNA transcript were also positive for protein product. Although there was no correlation between expression and grade of rejection, there was a trend to an increased number of positive cells in samples taken early after transplantation.

Analysis of serum TNF $\alpha$  levels have shown that in most cases with elevated levels, the amount of TNF $\alpha$  in samples taken within the first 30 days post-transplantation did not relate to grade of rejection [65]. In another study, serum levels were significantly increased in patients with moderate to severe rejection ( $P=0.001$ ) for samples taken in the first week post-transplantation [68]. Jordan et al. showed that for three patients with humoral allograft rejection, elevated levels coincided with rejection episodes [69]. However, in other studies [69–72], there was no association between serum TNF $\alpha$  levels and grade of cellular rejection. Grant et al. [71] found that when samples were taken after the initial 30 days of transplantation, (in order to overcome any stimulating effects of surgery, cardiopulmonary bypass, or RATG therapy on TNF $\alpha$  levels [73–76]), there was no demonstrable relationship between elevated levels of TNF $\alpha$  and grade of rejection. To assess whether the in situ expression of TNF $\alpha$  is reflected in the serum, the expression of TNF $\alpha$  in situ (for both mRNA and protein) was compared with serum TNF $\alpha$  levels [65]. Serum TNF $\alpha$  levels did not correspond with the number of TNF $\alpha$  positive cells/mm<sup>2</sup> within the biopsy ( $r=0.126$ ;  $P=NS$ ). Since TNF $\alpha$  is a locally acting potent cytokine, serum analysis will not accurately reflect in situ levels within a graft. Also, the methodology used in studies to detect intragraft TNF $\alpha$  mRNA and protein, suffer from a number of limitations and caution is necessary during interpretation. Since rejection is patchy, sampling error is

the major disadvantage of the EMB technique [77,78], calculated at 2% if four samples are taken, and 5% if only three samples are taken [79].

Subject variation in serum TNF $\alpha$  levels have led to studies on the genetic control of TNF $\alpha$  production [80–81]. Turner et al. (1995), studied the relationship between TNF $\alpha$  gene polymorphisms and TNF $\alpha$  production in immunosuppressed heart transplant recipients. Endotoxin stimulation of whole blood samples demonstrated a significant association between the microsatellite allele TNFd3 with TNF production [80]. When TNF $\alpha$  gene polymorphisms are studied in relation to those of interleukin-10 (IL-10), (an immunosuppressive cytokine that down-regulates the expression of TNF $\alpha$  [81]), certain combinations of TNF-A and IL-10 promoter gene polymorphisms are associated with acute cardiac rejection. In patients with high levels of rejection, significantly more patients were typed as high TNF $\alpha$ /low IL-10 producers compared with patients of low rejection levels [81]. In addition, we have identified a subgroup of heart transplant recipients who suffered acute cellular rejection that did not resolve with immunosuppressive therapy and ultimately led to their death. TNF $\alpha$  genotyping of these cases has identified a significant increase in the frequency of the TNF2 alleles by comparison to the whole population of heart transplant recipients. More than 82% of acute rejectors had the TNF2 allele, by comparison to only 35% in the whole transplant population ( $P<0.01$ ) [Azzawi, unpublished observations]. Although these genetic studies represent investigations into a few out of many different alleles for TNF $\alpha$  and its promoters, they provide early, but promising, findings.

### 3.3. Can TNF $\alpha$ be used as a predictor for rejection?

We showed a period of higher expression of TNF $\alpha$  early after transplantation, and suggest that its release may not be specific to rejection. Expression of TNF $\alpha$  following ATG (anti-thymocyte globulin) therapy [73,74] and ischaemia [75,76], have been well documented. ATG stimulates cytokine release, including TNF $\alpha$  [73,74]. Thus detection of cytokines during this stage may not be a reflection of rejection per se. Conversely, induction of TNF $\alpha$  mRNA transcripts can be blocked by immunosuppressive drugs, such as FK506 and cyclosporin [14]. Long term immunosuppression may therefore dampen down cytokine release. Our demonstration of the early, but not subsequent release of TNF $\alpha$  following transplantation, may reflect this process. Variations in immunosuppression protocols between centres may contribute to discrepancies in the results of cytokine studies.

The studies described in this review [5,60,61,68,69], have not analysed the relationship between intragraft TNF $\alpha$  expression and grade of rejection at subsequent biopsy occasions, when all contributing factors are excluded, including time post-transplant [5,68,72], ATG therapy [60], OKT3 therapy [61], and infection [68,69].

The detection of TNF protein in cardiac allografts in the absence of histological or clinical evidence of rejection [72] needs to be assessed in isolation from these contributing factors. When such factors are excluded, our own studies have shown that TNF $\alpha$  expression can be predictive of the next biopsy grade. Some cases with biopsies positive for the in situ protein expression of TNF $\alpha$  (over 70% of biopsies) will often have a higher grade of rejection on the subsequent biopsy occasion. This is true only for mild grades of rejection (ISHLT grades 1A and 1B). Larger numbers of samples need to be analysed to substantiate these findings. Our studies further concluded that intragraft expression of TNF $\alpha$  is not reflected in the serum, rendering the analysis of such levels unacceptable, as an alternative method of TNF $\alpha$  detection. Although the studies described in this review, do not establish whether increased TNF $\alpha$  expression is the 'cause' or 'effect' of rejection, the genetic studies indicate that stimulation of the inflammatory response (by alloantigen, ATG, or ischaemia) will result in large amounts of TNF $\alpha$  being secreted by individuals with a genetic predisposition to produce higher levels of TNF $\alpha$ .

#### 4. Role of TNF $\alpha$ in coronary artery disease (CAD)

A large inflammatory component may exist within the atherosclerotic lesion of CAD. The inflammatory response is initiated by the presence of memory T cells specific to oxidised low density lipoprotein. The elaboration of inflammatory cytokines, such as TNF $\alpha$ , is orchestrated by monocytes transmigrating into the lesions, and differentiating into macrophages. TNF $\alpha$  affects lipid metabolism and hyper-triglyceridaemia by decreasing lipoprotein lipase activity in cultured adipocytes. [82] It increases hepatic fatty acid synthesis [83] and is associated with increased levels of triglycerides [84]. TNF $\alpha$  probably plays a pivotal role in obesity-related insulin resistance. This is by attenuation of insulin receptor signalling by decreasing both insulin-stimulated autophosphorylation and the tyrosine kinase activity of the insulin receptor in cultured adipocytes [85]. TNF $\alpha$  could contribute to the development of atheroma through its direct action on endothelial function, stimulation of growth factors and chemoattractants, as well as synthesis and stimulation of adhesion molecules. Finally, TNF $\alpha$  increases the risk of CAD by interfering with the thrombotic process by enhancing procoagulant activity (PAI-1, von Willebrand factor) and suppressing the antithrombotic protein C pathway in endothelial cells [86] (Table 1).

TNF $\alpha$  has been demonstrated in 88% of atherosclerotic lesions but is absent from normal tissues [87]. TNF $\alpha$  expression increases with the severity of the lesion, suggesting it may play a role in disease evolution [88]. Arbustini et al. [89] showed by Western blotting and immunohistochemistry that TNF $\alpha$  was present in lipid-rich

plaques, with or without thrombosis. It was absent in normal control coronary arteries and present in minimum concentrations in a few fibrous plaques. Smooth muscle cells, macrophages and intimal cells were immunoreactive for this cytokine. Medial cells do not express TNF $\alpha$  mRNA, whereas 96% of intimal smooth muscle cells express this cytokine.

That TNF $\alpha$  expression in smooth muscle could be triggered by lipid intake was confirmed by electron microscopy [89]. Cultured human smooth muscle cells produce TNF $\alpha$  when incubated with low density lipoproteins [88]. TNF $\alpha$  mRNA is synthesised by smooth muscle cells and by macrophages [90]. The cytokine was present as a margin of lesions in reactive areas, where there was little lipid and fibrosis. Smooth muscle cells from plaques respond to both IL-1 and TNF $\alpha$  by manufacturing GM-CSF [91]. Cytokines may act in an autocrine fashion within a plaque, for example TNF $\alpha$  may induce expression of TNF $\alpha$  mRNA during monocyte differentiation [92].

Herrman et al. (1998) studied TNF $\alpha$  gene polymorphisms in relation to coronary artery disease and obesity [93]. The genotypic frequencies were similar in cases and controls in the high-risk populations in Belfast and France. However, the TNF $\alpha$  -308 A allele was more frequent in Belfast than in France and carriers of this allele were more frequently obese than non-carriers. Thus polymorphisms are unlikely to contribute to CAD risk but TNF $\alpha$  -308 polymorphism may be related to obesity. The TNF $\alpha$  -308 allele was associated with a parental history of myocardial infarction in both countries, but the lack of a case-control difference suggested this association might be spurious.

##### 4.1. Coronary angioplasty

Circulating TNF $\alpha$  is not released during transient ischaemia in patients undergoing coronary angioplasty [94]. The liberation of TNF $\alpha$  during myocardial infarction probably reflects an acute phase response to myocardial necrosis rather than ischaemia. A study of cardioatherectomy specimens taken at the time of percutaneous transluminal coronary angioplasty (PTCA) and subsequent restenosis were examined. The lesions were clinically and angiographically similar with equivalent lumina diameter before and after atherectomy. Restenotic lesions had increased expression of TNF $\alpha$  and fibronectin compared with the primary lesions ( $P = <0.05$ ). There was a trend for a greater number of T cells and increased expression of IL-1 in restenotic areas. An immune-inflammatory reaction probably contributed to neointimal formation and may represent a form of wound healing, possibly secondary to mechanical injury [95]. In this study there were no significant differences in the relative amounts of fibrosis or cellularity when comparing primary atherectomy tissue with restenotic tissues.

Recent studies on coronary graft arteriopathy suggest there is a reciprocal co-induction of TNF $\alpha$  and IL-1 $\beta$ . Both

cytokines regulate endothelial and smooth muscle fibronectin synthesis [96]. Neutralisation of TNF $\alpha$  activity in rabbits after cardiac transplantation reduces both the severity and number of coronary artery lesions. This was associated with less inflammation and a reduced accumulation of fibronectin in the vessel wall [97].

#### 4.2. Cardiopulmonary bypass and coronary artery grafts

A series of papers have studied cytokine levels following cardiopulmonary bypass. A study of two groups of patients, one with an ejection fraction of less than 0.45 (study group) and those of an ejection fraction of greater than 0.55 (control group) having coronary artery bypass grafting were investigated. The study and control groups did not differ with regard to age, sex, vessel involvement, number of grafts, cross-clamp time, extracorporeal circulation time, or duration of ventilation [98]. There were no complications in the control group. In the study group there were higher levels of IL-2, TNF $\alpha$ , and a higher maximum cytokine response to extracorporeal circulation for IL-2, soluble IL-2 receptor, IL-6 and TNF $\alpha$ . Preoperative left ventricular dysfunction is associated with a higher degree of proinflammatory cytokine release during elective coronary artery bypass grafting. Such a response is associated with impaired haemodynamics and a higher incidence of perioperative complications. This study examined arterial and mixed venous samples taken at ten points in time (24 h before, until 48 h after extracorporeal circulation). TNF $\alpha$  release preceded IL-6 liberation. This investigation was carried under normothermic conditions, which could have contributed to the higher level of cytokine release [99], compared with hypothermia.

Other published data concerning TNF $\alpha$  release during extracorporeal circulation are conflicting. Other studies have given varying results [100–104]. Wan et al. [105] studied pro-inflammatory cytokines such as TNF $\alpha$ , IL-6, IL-8 and anti-inflammatory cytokines, such as IL-10, in patients undergoing cardiopulmonary bypass. The cytokines were measured by arterial, coronary sinus and pulmonary artery catheters. Levels of TNF $\alpha$  and IL-6 were significantly higher in coronary sinus than arterial blood after aortic declamping. TNF $\alpha$  and IL-6 levels were higher in mixed venous than arterial blood within 1 h of declamping. They confirmed the myocardium was a major source of TNF $\alpha$  and IL-6 in patients undergoing cardiopulmonary bypass. Removal of TNF $\alpha$  and IL-6 by haemofiltration has beneficial effects on children undergoing cardiopulmonary bypass [106] but the data do not exclude significant cytokine release from other organs. After cardiopulmonary bypass other organs may have an inadequate blood supply and could be an important source of such mediators. The release of endotoxin and complement activation, seen during bypass, could trigger cytokine release. The lungs release TNF $\alpha$  during ischaemia and it is known that during cardiopulmonary bypass the lung does suffer damage

[107]. TNF $\alpha$  and IL-6 levels were significantly higher in mixed venous than arterial blood shortly after reperfusion [107]. The lungs were thought to consume rather than release pro-inflammatory cytokines in the early phase of reperfusion.

Meldrum et al. (1998) studied the levels of myocardial TNF $\alpha$  before and after cardiopulmonary bypass, and showed that it induced an increase in myocardial TNF $\alpha$ . They used immunolocalisation techniques to demonstrate that myocardial TNF $\alpha$  was locally produced, subsequent to bypass, by the myocytes themselves [76].

### 5. Role of TNF $\alpha$ in heart failure

Elevated circulating levels of TNF $\alpha$  and its soluble receptors have been demonstrated in advanced congestive heart failure (CHF) [4,42,108–110]. TNF $\alpha$  has various effects on cardiac function, leading to heart failure (discussed in Section 2.4). TNF $\alpha$  may thus have a causative role. Mann [34] has argued that as TNF $\alpha$  is produced following all forms of cardiac injury, it may act as a 'stress response' gene in the heart. Using whole mammalian hearts, TNF $\alpha$  mRNA can be induced within 30 min of a stressful stimulus with endotoxin challenge. TNF $\alpha$  mRNA levels returned to baseline levels soon after removal of the stimulus. TNF $\alpha$  stimulation of cultured cardiac myocytes resulted in increased heat shock protein (HSP 72) expression, which was completely abolished by a neutralising antibody against TNF $\alpha$  [111]. Very high concentrations of TNF $\alpha$ , within the pathophysiological range, resulted in lower levels of HSP expression [34].

Immunoreactivity for NO has been demonstrated in dilated cardiomyopathy [112]. Tissue was obtained from patients with end stage CHF undergoing primary orthotopic cardiac transplantation or endomyocardial biopsy. Inducible NOS was strongly expressed in myocytes in dilated cardiomyopathy, especially in subendocardial areas, and may contribute to the low contractility and the thromboembolic tendency in these patients. Dilated cardiomyopathy may have an inflammatory component and this will contribute to the pathogenesis and consequent cytokine production and iNOS induction [113]. The increased levels of iNOS in cardiomyopathy coincided with an abundant source of TNF $\alpha$ , not present in ischaemic heart disease or normal myocardium. There is no increase in concentrations in IL-1 $\alpha$ , soluble IL-2 receptor or TNF $\alpha$  concentrations in mild to moderate heart failure versus controls. In myocarditis, dilated cardiomyopathy and hypertrophic cardiomyopathy, TNF $\alpha$  was increased in up to 46% of patients in some groups [114]. TNF $\alpha$  may be raised in less than 25% of patients with acute myocardial infarction with large infarcts complicated by hypotension and pulmonary oedema [106].

Familial hypertrophic cardiomyopathy has been associated with HLA-DR4 and with other major histocom-

patibility complex haplotypes [115,116]. Dilated cardiomyopathy is associated with HLA-DR4 and HLA-DQw4 [117]. Thus raised concentrations of plasma TNF $\alpha$  in hypertrophic and dilated cardiomyopathy are probably associated within a major histocompatibility index. Kubota et al. (1998), however, were unable to identify any association between TNFA nor TNFB polymorphisms, and the elevation of circulating TNF $\alpha$  levels associated with congestive heart failure [118].

The stimulus for increased TNF $\alpha$  production in patients with CHF remains unclear [109], but maybe related to the local ischaemia associated with the reduced blood flow. In vitro experiments on perfused rat hearts suggest that the resultant oxidation products (H<sub>2</sub>O<sub>2</sub>) may activate a P38 mitogen-activated protein kinase (MAPK) which in turn induces TNF $\alpha$  production [119]. The suppression of this production by adenosine suggests a possible intrinsic mechanism for cardiac protection [120].

## 6. Conclusion

TNF $\alpha$  is a potent cytokine which acts not just on coronary arteries but also on myocardial fibres. Although TNF $\alpha$  cannot be used as a marker of allograft rejection, per se, it might be useful as a general indicator of 'stress' or damage. TNF $\alpha$  may act in concert with other cytokines during the rejection response, and may contribute to the development of atheroma in CAD. The association of TNF $\alpha$  with heart failure is apparent, although further study is necessary to establish any causal relationship.

Immunomodulation by antibodies to cytokines have not lived up to their promise. This may be because they are not given at the correct time clinically. Also, expecting a single cytokine to have an effect when it is part of an 'orchestra' is overoptimistic. The recognition of individuals with a genetic predisposition to high TNF $\alpha$  production, is necessary, and may require its assessment in relation to the overall cytokine genotype, in order to enable closer surveillance of high risk individuals.

## References

- [1] Saxne T, Palladino Jr. MA, Heinegar D et al. Detection of tumor necrosis factor alpha but not tumor necrosis factor beta in rheumatoid arthritis, synovial fluid and serum. *Arthritis Rheum* 1988;31:1041–1045.
- [2] Sharief MK, Hentges R. Association between tumor necrosis factor and disease progression in patients with Multiple Sclerosis. *New Eng J Med* 1991;325:467–472.
- [3] Natanson C, Eichenholz PW, Danner RL et al. Endotoxin and tumor necrosis factor challenges in dogs stimulate the cardiovascular profile in human septic shock. *J Exp Med* 1989;169:823–832.
- [4] Levine B, Kalman J, Mayer L et al. Elevated circulating levels of TNF $\alpha$  in severe chronic heart failure. *New Eng J Med* 1990;223:236–241.
- [5] Arbustini E, Grasso M, Diegole M et al. Expression of TNF $\alpha$  in human acute cardiac rejection. *Am J Pathol* 1991;139:709–715.
- [6] Carswell EA, Old LJ, Kassel RL et al. An endotoxin-induced serum factor that causes necrosis of tumors. *Proc Natl Acad Sci* 1975;72:3666–3670.
- [7] Gordon HM, Kucera G, Salvo R et al. TNF induces genes involved in inflammation, cellular and tissue repair, and metabolism in murine fibroblasts. *J Immunol* 1992;148:4021–4027.
- [8] Hlodan R, Pain RH. The folding and assembly pathway of TNF $\alpha$ , a globular trimeric protein. *Eur J Biochem* 1995;231:381–387.
- [9] Torre-Amione G, Kapadia S, Lee J et al. Expression and functional significance of TNF receptors in human myocardium. *Circulation* 1995;92:1487–1493.
- [10] Chensue SW, Remick DG, Shmyr-Forsch C et al. Immunohistochemical demonstration of cytoplasmic and membrane associated TNF in murine macrophages. *Am J Pathol* 1988;133:564–572.
- [11] Kapadia S, Lee JR, Torre-Amione G et al. TNF gene and protein expression in adult feline myocardium after endotoxin administration. *J Clin Invest* 1995;96:1042–1052.
- [12] Crabtree GR. Contingent genetic regulatory events in T Lymphocyte activation. *Science* 1989;243:355–358.
- [13] English K, Weaver WM, Wilson CB. Differential regulation of lymphotoxin and TNF genes in human T lymphocytes. *J Biol Chem* 1991;266:7108–7113.
- [14] Goldfeld AE, McCaffrey PG, Strominger JL, Rao A. Identification of a novel cyclosporin-sensitive element in the human TNF gene promoter. *J Exp Med* 1993;178:1365–1379.
- [15] Rhoades KL, Cai SJ, Golub SH, Economou JS. GM-CSF and IL-4 differentially regulate the human TNF $\alpha$  promoter region. *Cell Immunol* 1995;161:125–131.
- [16] Caput D, Beutler B, Hartog K et al. Identification of a common nucleotide sequence in the 3'-untranslated region of mRNA molecules specifying inflammatory mediators. *Proc Natl Acad Sci USA* 1986;83:1670–1674.
- [17] Shaw G, Kamen RA. A conserved AU sequence from the 3' untranslated region of GM-CSF mRNA mediates selective mRNA degradation. *Cell* 1986;46:659–667.
- [18] Han J, Huez G, Beutler B. Interactive effects of the TNF promoter and 3'-untranslated regions. *J Immunol* 1991;146:1843–1848.
- [19] Leiberman AP, Pitha PM, Shin ML. Poly A removal is the kinase regulated step in TNF mRNA decay. *J Biol Chem* 1992;267:2123–2126.
- [20] Krays V, Abdelaziz S, Huez G. Identification of protein binding TNF $\alpha$  mRNA UA-rich sequence, disruption of the interaction correlated with TNF $\alpha$  synthesis. *Eur Cytokine Netw* 1994;5:144–146.
- [21] Giroir BP, Johnson JH, Brown T et al. The tissue distribution of TNF biosynthesis during endotoxemia. *J Clin Invest* 1992;90:693–698.
- [22] Tovey MG, Content J, Gresser I et al. Genes for IFN beta 1 (IL-6), TNF, and IL-1 are expressed at high levels in the organs of normal individuals. *J Immunol* 1988;141:3106–3110.
- [23] Jacob CO, Fronck Z, Lewis GD et al. Heritable major histocompatibility complex class II associated differences in production of TNF $\alpha$ : relevance to genetic predisposition to systemic lupus erythematosus. *Proc Natl Acad Sci USA* 1990;87:1233–1238.
- [24] Pociot F, Briant L, Jongeneel CV et al. Association of TNF $\alpha$  and class II major histocompatibility complex alleles with the secretion of TNF $\alpha$  and TNF $\beta$  by human mononuclear cells: a possible link to insulin-dependent diabetes mellitus. *Eur J Immunol* 1993;23:224–228.
- [25] Turner DM, Williams DM, Sankaran D et al. An investigation of polymorphism in the IL-10 gene promoter. *Eur J Immunogen* 1997;24:1–8.
- [26] Awad MR, Turner DM, Sinnott PJ, Hutchinson IV. Polymorphisms in the TGF beta1 gene. *Eur J Immunogen* 1997;24:45.
- [27] Turner DM, Sankaran D, Grant SCD et al. TNF-A and IL-10 gene

- polymorphism and heart transplant rejection. *Eur J Immunogen* 1997;24:67.
- [28] Udalova IA, Nedospasov SA, Webb GC et al. Highly informative typing of the human TNF locus using six adjacent polymorphic markers. *Genomics* 1993;16:180–184.
- [29] Wilson AG, deVries N, Pociot F et al. An allelic polymorphism within the human TNF $\alpha$  promoter region is strongly associated with HLA A1, B8, and DR3 alleles. *J Exp Med* 1993;177:557–561.
- [30] Wilson AG, Symons JA, McDowell TL et al. Effects of a TNF $\alpha$  promoter base transition on transcriptional activity. *Br J Rheumatol* 1994;33(1):89.
- [31] Hamann A, Mantzoros C, Vidalpuig A, Flier JS. Genetic variability in the TNF promoter is not associated with type II diabetes mellitus. *Biochem Biophys Res Commun* 1995;211:833–839.
- [32] Brinkman BMN, Kaijzel EL, Huizinga TWJ et al. Detection of a C-insertion polymorphism within the human TNF A gene. *Human Genet* 1995;96:493–496.
- [33] Finkel MS, Oddis CV, Jacob TD et al. Negative inotropic effects of cytokines on the heart mediated by nitric oxide. *Science* 1992;257:387–389.
- [34] Mann DL. The effect of TNF $\alpha$  on cardiac structure and function: A tale of two cytokines. *J Cardiac Failure* 1996;2:S165–S172.
- [35] Schreiner GF. Immune modulation of cardiac cell function. *Trans Am Clin Climatol Assoc* 1998;109:39–49.
- [36] Oral H, Kapadia S, Nakano M et al. TNF $\alpha$  and the failing human heart. *Clin Cardiol* 1995;18:IV20–IV27.
- [37] Piano MR, Bondmass M, Schwertz DW. The molecular and cellular pathophysiology of heart failure. *Heart Lung* 1998;27:3–19.
- [38] Nakamura K, Fushimi K, Kouchi H et al. Inhibitory effects of antioxidants on neonatal rat cardiac myocyte hypertrophy induced by tumor necrosis factor-alpha and angiotensin II. *Circulation* 1998;98:794–799.
- [39] Ono K, Matsumori A, Shioi T, Furukawa Y, Sasayama S. Cytokine gene expression after myocardial infarction in rat hearts: possible implication in left ventricular remodeling. *Circulation* 1998;98:149–156.
- [40] Pulkki KJ. Cytokines and cardiomyocyte death. *Ann Med* 1997;29:339–343.
- [41] Walley KR, Hebert PC, Wakai Y et al. Decrease in left ventricular contractility after tumor necrosis factor-alpha infusion in dogs. *J Appl Physiol* 1994;76:1060–1067.
- [42] Ceconi C, Curello S, Bachetti T, Corti A, Ferrari R. Tumor necrosis factor in congestive heart failure: a mechanism of disease for the new millennium? *Prog Cardiovasc Dis* 1998;48:25–30.
- [43] Panas D, Khadour FH, Szabo C, Schulz R. Proinflammatory cytokines depress cardiac efficiency by a nitric oxide-dependent mechanism. *Am J Physiol* 1998;275:H1016–H1023.
- [44] Edmunds NJ, Woodward B. Effects of tumour necrosis factor-alpha on the coronary circulation of the rat isolated perfused heart: a potential role for thromboxane A2 and sphingosine. *Br J Pharmacol* 1998;124:493–498.
- [45] Yokoyama T, Vaca L, Rossen RD et al. Cellular basis for the negative inotropic effects of TNF $\alpha$  in the adult mammalian heart. *J Clin Invest* 1993;92:2303–2312.
- [46] Cannon PJ, Yang X, Szabolcs MJ et al. The role of inducible nitric oxide synthase in cardiac allograft rejection. *Cardiovasc Res* 1998;38:6–15.
- [47] Oral H. Sphingosine mediates the immediate negative inotropic effects of tumor necrosis factor-alpha in the adult mammalian cardiac myocyte. *J Biol Chem* 1997;272:4836–4842.
- [48] Muller-Werdan U, Schumann H, Fuchs R et al. Tumor necrosis factor alpha is cardiodepressant in pathophysiologically relevant concentrations without inducing inducible nitric oxide synthase (iNOS) or triggering serious cytotoxicity. *J Mol Cell Cardiol* 1997;29:2915–2923.
- [49] Meldrum DR. Tumor necrosis factor in the heart. *Am J Physiol* 1998;274:R577–R595.
- [50] Bozhurt B, Kribbs SB, Clubb FJ et al. Pathophysiologically relevant concentrations of tumor necrosis factor-alpha promote progressive left ventricular dysfunction and remodeling in rats. *Circulation* 1998;97:1382–1391.
- [51] Billingham ME, Nathaniel RB, Carey NRB et al. A working formulation for the standardization of nomenclature in the diagnosis of heart and lung rejection: Heart rejection study group. *J Heart Transpl* 1990;9:587–593.
- [52] Alexander DZ, Pearson TC, Hendrix R et al. Analysis of effector mechanisms in murine cardiac allograft rejection. *Transpl Immunol* 1996;4:46–48.
- [53] Kaye MP. The registry of the international society for heart and lung transplantation: ninth official report–1992. *J Heart Lung Transpl* 1992;4:599–606.
- [54] Fishbein MC, Bell G, Lones MA et al. Grade 2 cellular heart rejection: does it exist. *J Heart Lung Transpl* 1994;13:1051–1057.
- [55] Winters GL, McManus BM. Consistencies and controversies in the application of the international society for the heart and lung transplantation working formulation for heart transplant biopsy specimens. *J Heart Lung Transpl* 1996;15:728–735.
- [56] Hutchinson IV. Immune mechanisms of long-term graft acceptance. *Adv Nephrol* 1996;25:17–37.
- [57] Pober JS, Cotran RS. The role of endothelial cells in inflammation. *Transpl* 1990;50:537–540.
- [58] Chollet-Martin S, Depoix JP, Hvass Y et al. Raised plasma levels of TNF in heart allograft rejection. *Transplant Proc* 1990;22:283–285.
- [59] Maury CPI, Teppo AM. Raised serum levels of cachectin/tumor necrosis factor in renal allograft rejection. *J Exp Med* 1987;166:1132–1136.
- [60] McLaughlin PJ, Aikawa A, Davies HM et al. Evaluation of sequential plasma and urinary tumour necrosis factor levels in renal allograft recipients. *Transpl* 1991;51:1225–1228.
- [61] Imagawa DK, Millis JM, Olthoff KM et al. The role of TNF $\alpha$  in allograft rejection I: Evidence that elevated levels of TNF $\alpha$  predict rejection following orthotopic liver transplantation. *Transpl* 1990;50:219–225.
- [62] Imagawa DK, Millis JM, Olthoff KM et al. The role of TNF $\alpha$  in allograft rejection II evidence that antibody therapy against TNF $\alpha$  and lymphotoxin enhances cardiac allograft survival in rats. *Transpl* 1990;50:189–193.
- [63] Lin H, Chensue SW, Strieter RM et al. Antibodies against tumour necrosis factor prolong cardiac allograft survival in the rat. *J Heart Lung Transpl* 1992;11:330–335.
- [64] Stevens HPJD, vanderKwast TH, vanderMeide PH et al. Synergistic immunosuppression effects of monoclonal antibodies specific for interferon-gamma and TNF $\alpha$ : a skin transplantation study in the rhesus monkey. *Transpl* 1990;50:856–859.
- [65] Azzawi M, Grant SCD, Hasleton PS et al. TNF $\alpha$  mRNA and protein in cardiac transplant biopsies; comparison with serum TNF $\alpha$  levels. *Cardiovasc Res* 1996;32:551–556.
- [66] Vandenbroecke C, Caillat-Zucman S, Legendre C et al. Differential in situ expression of cytokines in renal allograft rejection. *Transpl* 1991;51:602–609.
- [67] Noronha IL, Eberlein-Gonka M, Hartley B et al. In situ expression of TNF $\alpha$ , IFN gamma, and IL-2 receptors in renal allograft biopsies. *Transpl* 1992;54:1017–1024.
- [68] Abdallah AN, Billes MA, Attia Y et al. Evaluation of plasma levels of tumor necrosis factor alpha and interleukin-6 as rejection markers in a cohort of 142 heart-grafted patients followed by endomyocardial biopsy. *Eur Heart J* 1997;18:1024–1029.
- [69] Jordan SC, Czer L, Toyoda M et al. Serum cytokine levels in heart allograft recipients: correlation with findings on endomyocardial biopsy. *J Heart Lung Transpl* 1993;12:333–337.
- [70] Grant SCD. Cytokines and cardiac transplantation. M.D. Thesis, 1995, University of Leeds.
- [71] Grant SCD, Lamb WR, Hutchinson IV, Brenchley PEC. Serum soluble adhesion molecules and cytokines in cardiac allograft rejection. *Transpl Immunol* 1994;2:321–325.



- [72] Torre-Amione G, MacLellan W, Kapadia S et al. Tumor necrosis factor-alpha is persistently expressed in cardiac allografts in the absence of histological or clinical evidence of rejection. *Transpl Proc* 1998;30:875–877.
- [73] Debets JMH, Leunissen KML, VanHooff HJ et al. Evidence of involvement of TNF in adverse reactions during treatment of kidney allograft rejection with antithymocyte globulin. *Transpl* 1989;47:487–492.
- [74] Grant SCD, Lamb WR, Gallati H et al. Release of TNF $\alpha$ , IL-6, and the TNF receptors p55 and p75 following ATG therapy in heart and heart/lung transplant recipients. *J Heart Lung Transpl* 1993;12:S72.
- [75] Serrick C, Adoumie R, Giaid A, Shennib H. The early release of interleukin-2, tumor necrosis factor and interferon-gamma after ischemia reperfusion injury in the lung allograft. *Transpl* 1994;58:1158–1162.
- [76] Meldrum DR, Meng X, Dinarello CA et al. Human myocardial tissue TNF expression following acute global ischemia in vivo. *J Mol Cell Cardiol* 1998;30:1683–1689.
- [77] Nakhleh RE, Jones J, Goswitz JJ et al. Correlation of EMB findings with autopsy findings in human cardiac allografts. *J Heart Lung Transpl* 1992;11:479–485.
- [78] Sharples LD, Cary N, Large SR, Wallwork J. Error rates with which EMB specimens are graded for rejection after cardiac transplantation. *Am J Cardiol* 1992;70:527–530.
- [79] Stovin PGI. Monitoring of cardiac rejection by endomyocardial biopsy. In: Wallwork J, editor, *Heart and heart lung transplantation*, Philadelphia: WB, 1989, pp. 313–340.
- [80] Turner DM, Grant SCD, Lamb WR et al. A genetic marker of high TNF $\alpha$  production in heart transplant recipients. *Transpl* 1995;60:1113–1117.
- [81] Turner DM, Grant SCD, Yonan N et al. Cytokine gene polymorphism and heart transplant rejection. *Transpl* 1997;64:776–779.
- [82] Morin L, Schlaepfer I, Eckela H. Tumour necrosis factor-alpha eliminates binding of NF-Y and octamer-binding protein to the lipoprotein lipase promoter in 3T 3-L1 adipocytes. *J Clin Invest* 1995;95:1684–1689.
- [83] Feingold KR, Grunfeld C. Role of cytokines in inducing hyperlipidaemia. *Diabetes* 1992;41(suppl. 2):97–101.
- [84] Starnes Jr. HR, Warren RS, Jeevanadem M et al. Tumor necrosis factor and the acute metabolic response to injury in man. *J Clin Invest* 1998;82:1321–1325.
- [85] Hotamisligil G S, Peraldi P, Budavari A et al. IRS-1-mediated inhibition of insulin receptor tyrosine kinase activity in TNF- $\alpha$  and obesity-induced insulin resistance. *Science* 1996;271:665–668.
- [86] Nawroth PP, Stem DM. Modulation of endothelial cell hemostatic properties by tumor necrosis factor. *J Exp Med* 1986;163:740–745.
- [87] Barath P, Fishbein MC, Cao J et al. Detection and localisation of tumor necrosis factor in human atheroma. *Am J Cardiol* 1990;65:297–302.
- [88] Barath P, Fishbein MC, Cao J et al. Tumour necrosis factor gene expression in human vascular, intimal smooth muscle cells detected by in situ hybridisation. *Am J Pathol* 1990;137:503–509.
- [89] Arbustini E, Grasso M, Diegoli M et al. Coronary atherosclerotic plaques with and without thrombus in ischemic heart syndromes: A morphologic, immunohistochemical and biochemical study. *Am J Cardiol* 1991;68:36B–50B.
- [90] Rayment NB, Moss E, Faulkner L et al. Synthesis of TNF $\alpha$  and TGF $\beta$  mRNA in the different micro-environments in atheromatous plaques. *Cardiovasc Res* 1996;32:1123–1130.
- [91] Filonzi EL, Zoellner H, Stanton H, Hamilton JA. Cytokine regulation of granulocyte-macrophage colony stimulating factor and macrophage colony stimulating factor production in human arterial smooth muscle cells. *Atherosclerosis* 1993;99:241–252.
- [92] Tipping PG, Hancock WW. Production of tumour necrosis factor and interleukin-1 by macrophages from human atheromatous plaques. *Am J Pathol* 1993;142:1721–1728.
- [93] Herrmann S-M, Ricard S, Nicaud V et al. Polymorphisms of the tumour necrosis factor-alpha gene, coronary artery disease and obesity. *Eur J Invest* 1998;28:59–66.
- [94] Weidemann CJ, Weidemann FJ, Herold M et al. Plasma levels of atrial natriuretic peptide and tumor necrosis factor-alpha during transient myocardial ischaemia in patients with stable angina. *Klin Wochenschr* 1991;69:944.
- [95] Clausell N, CorraeLima VC, Molossi S et al. Expression of tumour necrosis factor alpha and accumulation of fibronectin in coronary artery restenosis lesions retrieved by atherectomy. *Br Heart J* 1995;73:534–539.
- [96] Molossi S, Clausell N, Rabinovitch N. Reciprocal induction of tumour necrosis factor-alpha and interleukin-1 beta activity mediate fibronectin synthesis in coronary artery smooth muscle cells. *J Cell Physiol* 1995;163:19–29.
- [97] Clausell N, Molossi S, Sett S, Rabinovitch N. In vivo blockade of tumor necrosis factor-alpha in cholesterol-fed rabbits following cardiac transplant inhibits acute coronary artery neo-intimal formation. *Circulation* 1994;89:2768–2779.
- [98] Deng MC, Dasch B, Erren M, Mollhoff T, Scheld HH. Impact of left ventricular dysfunction on cytokines, hemodynamic, and outcome in bypass grafting. *Ann Thorac Surg* 1996;62:184–190.
- [99] Menasche P, Haydur S, Peynet J et al. A potential mechanism of vasodilatation after heart surgery. The temperature dependant release of cytokines. *J Thorac Cardiovasc Surg* 1994;107:293–299.
- [100] Haeflner-Cavaillon N, Rousselier N, Ponzio O et al. Induction of interleukin-1 production in patients undergoing cardiopulmonary bypass. *J Thorac Cardiovasc Surg* 1989;98:1100–1106.
- [101] Steinberg JB, Kapelanski DP, Olson JD, Weiler JM. Cytokine and complement levels in patients undergoing cardiopulmonary bypass. *J Thorac Cardiovasc Surg* 1993;106:1008–1016.
- [102] Deng MC, Wiedner M, Erren M et al. Arterial and venous cytokine response to cardiopulmonary bypass for the low risk CABG and relation to hemodynamics. *Eur J Cardiothorac Surg* 1995;9:22–29.
- [103] Millar AB, Armstrong L, van der Linden J et al. Cytokine production and hemofiltration in children undergoing cardiopulmonary bypass. *Am Thorac Surg* 1993;56:1499–1502.
- [104] Butler J, Pillai R, Rucker GM et al. Effect of cardiopulmonary bypass on systemic release of neutrophil elastase and tumor necrosis factor. *J Thorac Cardiovasc Surg* 1993;105:25–30.
- [105] Wan S, DeSmet J-M, Barvais L et al. Myocardium is a major source of proinflammatory cytokines in patients undergoing cardiopulmonary bypass. *J Thorac Cardiovasc Surg* 1996;112:806–811.
- [106] Maury CP, Teppo A-M. Circulating tumor necrosis factor-alpha (cachectin) in myocardial infarction. *J Int Med* 1989;225:333–336.
- [107] Hasleton PS. In: *Spencer's pathology of the lung*, 5th Edn, McGraw Hill, 1996, pp. 377–379.
- [108] Katz SD, Rao R, Berman JW et al. Pathophysiological correlates of increased serum TNF in patients with congestive heart failure. *Circulation* 1994;90:12–16.
- [109] Ferrari R. Tumor necrosis factor in CHF: a double facet cytokine. *Cardiovasc Res* 1998;37:554–559.
- [110] Blum A, Miller H. Role of cytokines in heart failure. *Am Heart J* 1998;135:181–186.
- [111] Nakano M, Knowlton AA, Dibbs Z, Mann DL. Tumor necrosis factor-alpha confers resistance to hypoxic injury in the adult mammalian cardiac myocyte. *Circulation* 1998;97:1392–1400.
- [112] Habib FM, Springall D, Davies GJ et al. Tumor necrosis factor and inducible nitric oxide synthase in dilated cardiomyopathy. *Lancet* 1996;347:1151–1155.
- [113] Kroncke K-D, Fesel K, Kolb-Bachofen V. Inducible nitric oxide synthase and its product nitric oxide, a small molecule with complex biological activities. *Biol Chem Hoppe-Seyler* 1995;376:327–343.
- [114] Matsumori A, Yamada T, Suzuki H, Matoba Y, Sasayama S. Increased circulating cytokines in myocarditis and cardiomyopathy. *Br Heart J* 1994;72:561–566.

- [115] Matsumori A, Hirose K, Wakabayashi A et al. HL-A and hypertrophic cardiomyopathy. *Am Heart J* 1979;97:428–431.
- [116] Matsumori A, Wakabayashi A, Teraski PI et al. HLA-DRW4 antigen linkage in patients with hypertrophic obstructive cardiomyopathy. *Am Heart J* 1981;101:14–16.
- [117] Carlquist JF, Menlove RL, Murray MB, O'Connell JB, Anderson JL. HLA class II (DR and DQ) antigen associations in idiopathic dilated cardiomyopathy. Validation study and meta-analysis have published HLA association studies. *Circulation* 1991;83:515–522.
- [118] Kubota T, McNamara DM, Wang JJ et al. Effects of tumor necrosis factor gene polymorphs on patients with congestive heart failure. *Circulation* 1998;97:2499–2501.
- [119] Meldrum DR, Dinarello CA, Cleveland JC et al. Hydrogen peroxide induces tumor necrosis factor alpha-mediated cardiac injury by a P38 mitogen-activated protein kinase-dependent mechanism. *Surgery* 1998;124:291–296.
- [120] Meldrum DR, Cain BS, Cleveland JC et al. Adenosine decreases post-ischaemic cardiac TNF production: anti-inflammatory implications for preconditioning and transplantation. *Immunology* 1997;92:472–477.
